# Supplementary figures and images for: Dental Caries Thresholds among Adolescents in England, Wales and Northern Ireland, 2013 at 12, and 15 years: Implications for Epidemiology and Clinical Care
Source: Research Square preprint supplement (doi:10.21203/rs.3.rs-109208/v1), 2020-11-25

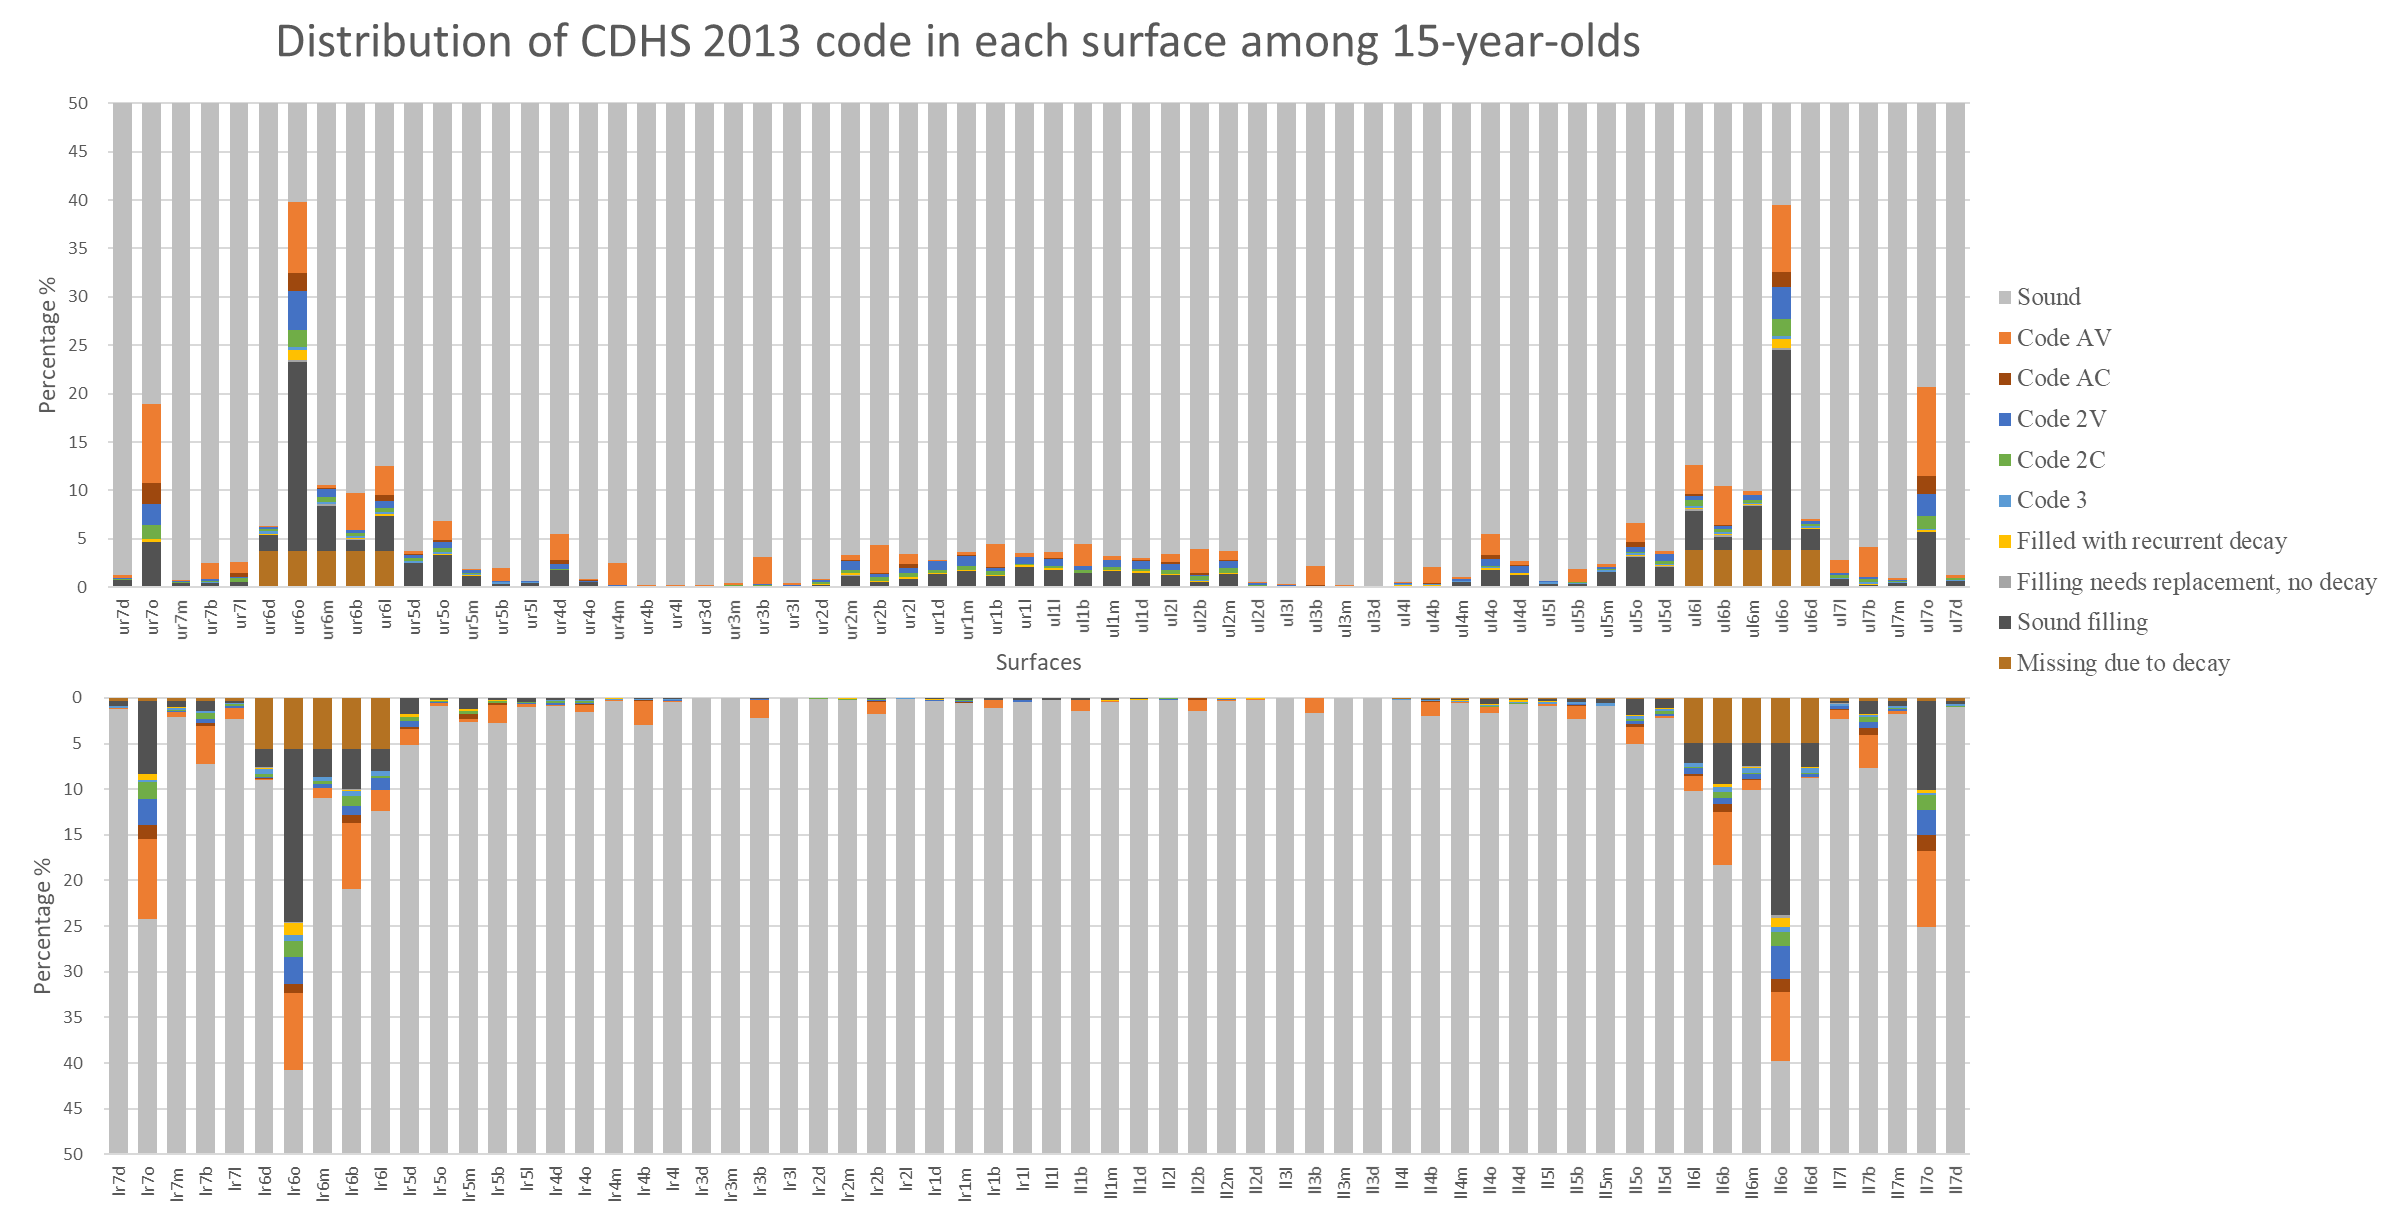


**Appendix Figure 2. Distribution of CDHS 2013 code in each surface of 15-year-olds (n = 2,160)**

Supplement: Supplementary file 2 [file 66aad8d24bb6436ffc83da65.docx]

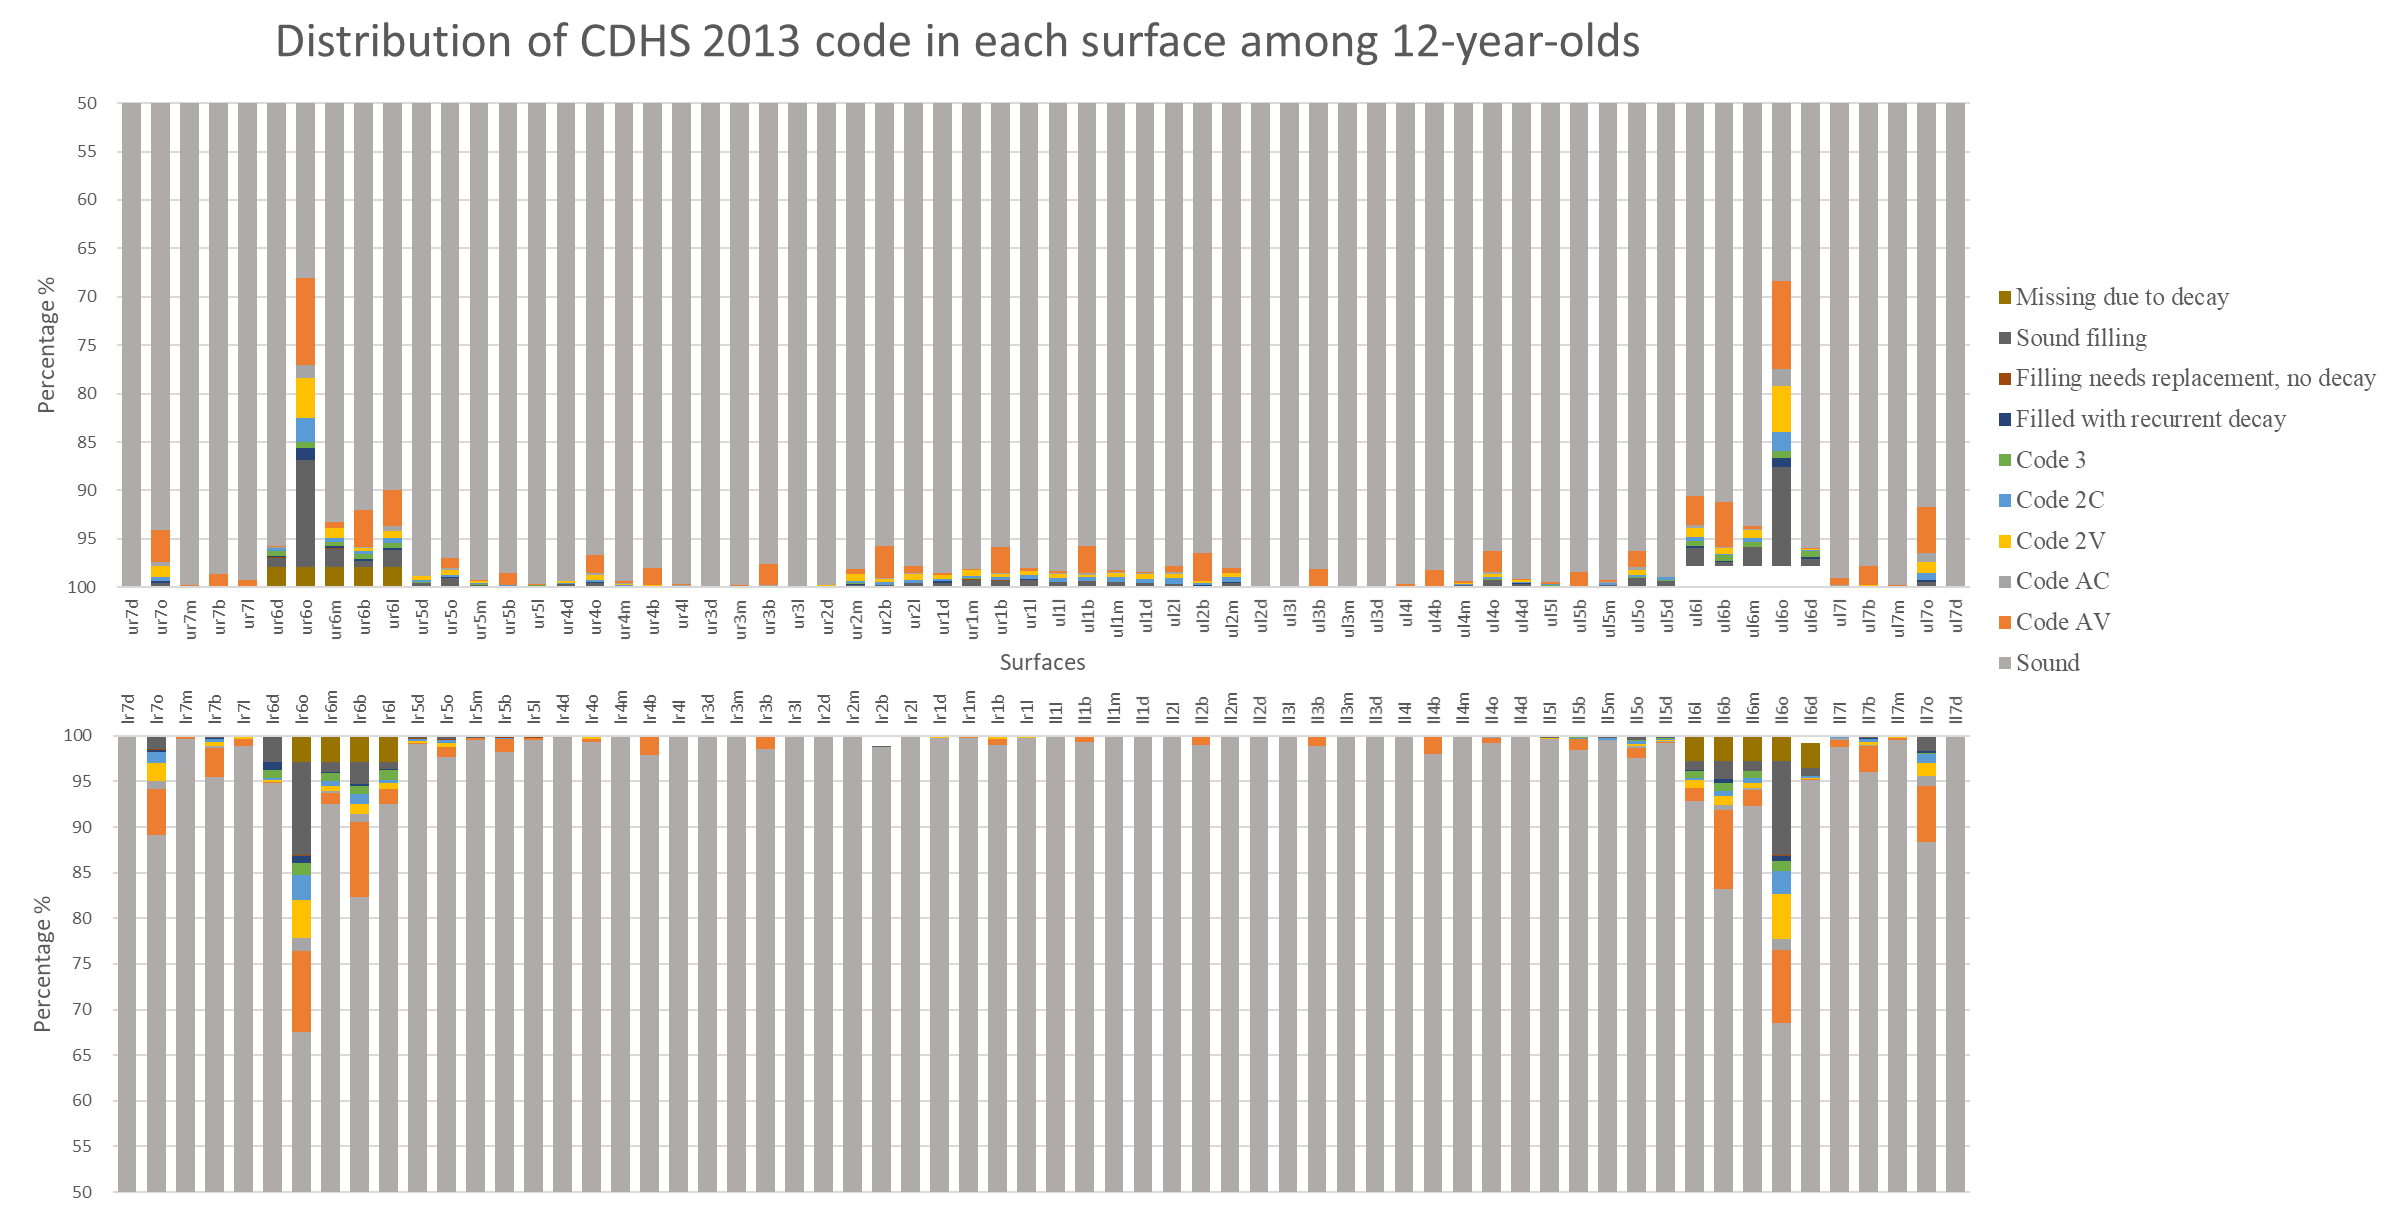


**A****ppendix Figure 1. Distribution of CDHS 2013 code in each surface of 12-year-olds (n = 2,532)**

Supplement: Supplementary file 6 [file f27432127cbbf1e478c49a8e.docx]
